# Supplementary material for: Biochemical production of short-chain alcohols from glycerol: process simulation and economic evaluation
Source: Royal Society of Chemistry journal article supplement (doi:10.1039/d4se00229f), 2024-01-01
Supplement: d4se00229f1.pdf [file d4se00229f1.pdf]

**Supplementary Information for “Biochemical Production of Short-Chain Alcohols  
from Glycerol: Process Simulation and Economic Evaluation”**

Lia G. M. Albuquerque <sup>1</sup>, Raquel M. Cavalcante <sup>2</sup> and André F. Young <sup>1\*</sup>

<sup>1</sup> Departamento de Engenharia Química e de Petróleo, Universidade Federal Fluminense,  
Rua Passo da Pátria, 156, Niterói, Brazil.

<sup>2</sup> Escola de Química, Universidade Federal do Rio de Janeiro, Av. Athos da Silveira  
Ramos, 149, Rio de Janeiro, Brazil.

\* ayoung@id.uff.br

**Contents**

This document presents:

- 9 pages;

- 6 tables.

**Table S.1.** Process streams for ethanol production.

| <b>Stream</b>                   | <b>1</b> | <b>2</b>  | <b>3</b>  | <b>4</b>  | <b>5</b>  | <b>6</b>  | <b>7</b>  | <b>8</b>  | <b>9</b>  | <b>10</b> | <b>11</b> | <b>12</b> | <b>13</b> | <b>14</b> |
|---------------------------------|----------|-----------|-----------|-----------|-----------|-----------|-----------|-----------|-----------|-----------|-----------|-----------|-----------|-----------|
| Temperature (°C)                | 25.0     | 25.0      | 25.0      | 24.9      | 37.0      | 37.0      | 37.0      | 37.0      | 100.0     | 78.2      | 154.0     | 154.0     | 154.0     | 35.1      |
| Pressure (atm)                  | 1.0      | 1.0       | 1.0       | 1.0       | 1.0       | 1.0       | 1.0       | 1.0       | 1.0       | 1.0       | 3.8       | 3.8       | 3.8       | 1.0       |
| Vapor mass fraction             | 0.0000   | 0.0000    | 0.0000    | 0.0000    | 0.0000    | 0.0000    | 0.0000    | 0.0000    | 0.0000    | 1.0000    | 1.0000    | 1.0000    | 1.0000    | 0.0000    |
| Liquid mass fraction            | 1.0000   | 1.0000    | 0.0000    | 0.9996    | 0.9996    | 0.9996    | 0.7059    | 1.0000    | 1.0000    | 0.0000    | 0.0000    | 0.0000    | 0.0000    | 1.0000    |
| Solid mass fraction             | 0.0000   | 0.0000    | 1.0000    | 0.0004    | 0.0004    | 0.0004    | 0.2941    | 0.0000    | 0.0000    | 0.0000    | 0.0000    | 0.0000    | 0.0000    | 0.0000    |
| Mass enthalpy (kJ/kg)           | -7,246.9 | -15,864.4 | -11,859.1 | -15,776.3 | -15,726.6 | -15,727.5 | -14,590.8 | -15,729.0 | -15,509.1 | -5,436.4  | -5,309.3  | -6,507.8  | -4,939.4  | -6,048.4  |
| Molar flow (kmol/h)             | 11.3     | 5,701.8   | 1.7       | 5,714.8   | 5,714.8   | 5,726.1   | 7.2       | 5,718.9   | 5,706.0   | 12.9      | 12.9      | 3.7       | 9.2       | 9.2       |
| Volume flow (m <sup>3</sup> /h) | 0.8      | 103.3     | 0.0       | 104.1     | 105.4     | 105.9     | 0.1       | 105.8     | 112.4     | 366.9     | 116.7     | 33.4      | 83.2      | 0.5       |
| Mass flow (kg/h)                | 1,042.0  | 102,720.0 | 41.7      | 103,803.7 | 103,803.7 | 103,803.7 | 141.7     | 103,662.0 | 103,109.4 | 552.6     | 552.6     | 130.3     | 422.2     | 422.2     |
| Comp. Mass fraction             |          |           |           |           |           |           |           |           |           |           |           |           |           |           |
| Water                           | 0.0000   | 1.0000    | 0.0000    | 0.9896    | 0.9896    | 0.9896    | 0.6988    | 0.9900    | 0.9950    | 0.0498    | 0.0498    | 0.1944    | 0.0052    | 0.0052    |
| Glycerol                        | 1.0000   | 0.0000    | 0.0000    | 0.0100    | 0.0100    | 0.0000    | 0.0000    | 0.0000    | 0.0000    | 0.0000    | 0.0000    | 0.0000    | 0.0000    | 0.0000    |
| <i>E. coli</i>                  | 0.0000   | 0.0000    | 1.0000    | 0.0004    | 0.0004    | 0.0004    | 0.2941    | 0.0000    | 0.0000    | 0.0000    | 0.0000    | 0.0000    | 0.0000    | 0.0000    |
| Formic acid                     | 0.0000   | 0.0000    | 0.0000    | 0.0000    | 0.0000    | 0.0047    | 0.0033    | 0.0047    | 0.0047    | 0.0000    | 0.0000    | 0.0000    | 0.0000    | 0.0000    |
| Ethanol                         | 0.0000   | 0.0000    | 0.0000    | 0.0000    | 0.0000    | 0.0053    | 0.0038    | 0.0053    | 0.0003    | 0.9502    | 0.9502    | 0.8056    | 0.9948    | 0.9948    |

**Table S.2.** Process streams for propanol production.

| Stream                          | 1        | 2         | 3         | 4         | 5         | 6         | 7         | 8         | 9         | 10       | 11       | 12        | 13       | 14       |
|---------------------------------|----------|-----------|-----------|-----------|-----------|-----------|-----------|-----------|-----------|----------|----------|-----------|----------|----------|
| Temperature (°C)                | 25.0     | 25.0      | 25.0      | 24.6      | 31.0      | 31.0      | 31.0      | 31.0      | 100.1     | 89.8     | 110.7    | 110.7     | 110.7    | 35.1     |
| Pressure (atm)                  | 1.0      | 1.0       | 1.0       | 1.0       | 1.0       | 1.0       | 1.0       | 1.0       | 1.0       | 1.0      | 1.3      | 1.3       | 1.3      | 1.0      |
| Vapor mass fraction             | 0.0000   | 0.0000    | 0.0000    | 0.0000    | 0.0000    | 0.0000    | 0.0000    | 0.0000    | 0.0000    | 1.0000   | 1.0000   | 1.0000    | 1.0000   | 0.0000   |
| Liquid mass fraction            | 1.0000   | 1.0000    | 0.0000    | 0.9928    | 0.9928    | 0.9928    | 0.6970    | 1.0000    | 1.0000    | 0.0000   | 0.0000   | 0.0000    | 0.0000   | 1.0000   |
| Solid mass fraction             | 0.0000   | 0.0000    | 1.0000    | 0.0072    | 0.0072    | 0.0072    | 0.3030    | 0.0000    | 0.0000    | 0.0000   | 0.0000   | 0.0000    | 0.0000   | 0.0000   |
| Mass enthalpy (kJ/kg)           | -7,246.9 | -15,864.4 | -11,859.1 | -15,494.2 | -15,468.7 | -15,400.3 | -14,345.1 | -15,426.0 | -15,438.3 | -7,574.4 | -7,538.0 | -11,945.3 | -4,128.3 | -5,034.6 |
| Molar flow (kmol/h)             | 11.3     | 1,392.1   | 7.7       | 1,411.1   | 1,411.1   | 1,416.2   | 31.2      | 1,385.0   | 1,348.1   | 36.9     | 36.9     | 25.7      | 11.2     | 11.2     |
| Volume flow (m <sup>3</sup> /h) | 0.8      | 25.2      | 0.0       | 26.0      | 26.2      | 26.6      | 0.4       | 26.2      | 26.7      | 1.087.5  | 861.6    | 603.0     | 258.0    | 0.8      |
| Mass flow (kg/h)                | 1,042.0  | 25,079.0  | 189.5     | 26,310.5  | 26,310.5  | 26,310.5  | 625.4     | 25,685.1  | 24,502.0  | 1,183.2  | 1,183.2  | 516.1     | 667.1    | 667.1    |
| Comp. Mass fraction             |          |           |           |           |           |           |           |           |           |          |          |           |          |          |
| Water                           | 0.0000   | 1.0000    | 0.0000    | 0.9532    | 0.9532    | 0.9532    | 0.6692    | 0.9601    | 0.9884    | 0.3747   | 0.3747   | 0.8556    | 0.0027   | 0.0027   |
| Glycerol                        | 1.0000   | 0.0000    | 0.0000    | 0.0396    | 0.0396    | 0.0000    | 0.0000    | 0.0000    | 0.0000    | 0.0000   | 0.0000   | 0.0000    | 0.0000   | 0.0000   |
| <i>E. coli</i>                  | 0.0000   | 0.0000    | 1.0000    | 0.0072    | 0.0072    | 0.0072    | 0.3030    | 0.0000    | 0.0000    | 0.0000   | 0.0000   | 0.0000    | 0.0000   | 0.0000   |
| Propionic acid                  | 0.0000   | 0.0000    | 0.0000    | 0.0000    | 0.0000    | 0.0110    | 0.0077    | 0.0111    | 0.0116    | 0.0005   | 0.0005   | 0.0012    | 0.0000   | 0.0000   |
| Propanol                        | 0.0000   | 0.0000    | 0.0000    | 0.0000    | 0.0000    | 0.0286    | 0.0201    | 0.0288    | 0.0000    | 0.6248   | 0.6248   | 0.1432    | 0.9973   | 0.9973   |

**Table S.3.** Process streams for butanol production.

| Stream                          | 1        | 2         | 3         | 4         | 5         | 6         | 7         | 8         | 9         | 10        | 11        | 12        | 13        | 14       |
|---------------------------------|----------|-----------|-----------|-----------|-----------|-----------|-----------|-----------|-----------|-----------|-----------|-----------|-----------|----------|
| Temperature (°C)                | 25.0     | 25.0      | 25.0      | 24.9      | 37.0      | 37.0      | 37.0      | 37.0      | 112.0     | 100.0     | 94.2      | 99.4      | 100.0     | 91.9     |
| Pressure (atm)                  | 1.0      | 1.0       | 1.0       | 1.0       | 1.0       | 1.0       | 1.0       | 1.0       | 1.0       | 1.0       | 1.0       | 1.0       | 1.0       | 1.0      |
| Vapor mass fraction             | 0.0000   | 0.0000    | 0.0000    | 0.0000    | 0.0000    | 0.0000    | 0.0000    | 0.0000    | 0.9998    | 0.0000    | 0.0000    | 0.6967    | 0.0000    | 1.0000   |
| Liquid mass fraction            | 1.0000   | 1.0000    | 0.0000    | 0.9977    | 0.9977    | 0.9977    | 0.6970    | 1.0000    | 0.0002    | 1.0000    | 1.0000    | 0.3033    | 1.0000    | 0.0000   |
| Solid mass fraction             | 0.0000   | 0.0000    | 1.0000    | 0.0023    | 0.0023    | 0.0023    | 0.3030    | 0.0000    | 0.0000    | 0.0000    | 0.0000    | 0.0000    | 0.0000    | 0.0000   |
| Mass enthalpy (kJ/kg)           | -7,246.9 | -15,864.4 | -11,859.1 | -15,739.7 | -15,690.0 | -15,659.6 | -14,514.0 | -15,668.3 | -13,138.5 | -15,529.0 | -14,890.6 | -13,385.7 | -15,520.0 | -7,592.1 |
| Molar flow (kmol/h)             | 11.3     | 4,245.2   | 7.2       | 4,263.6   | 4,263.6   | 4,266.7   | 29.6      | 4,237.2   | 4,237.2   | 3,435.3   | 801.9     | 801.9     | 755.6     | 46.3     |
| Volume flow (m <sup>3</sup> /h) | 0.8      | 76.9      | 0.0       | 77.7      | 78.7      | 79.1      | 0.4       | 78.7      | 133,018.6 | 67.5      | 16.6      | 16,636.8  | 14.9      | 1,371.1  |
| Mass flow (kg/h)                | 1,042.0  | 76,477.7  | 177.1     | 77,696.8  | 77,696.8  | 77,696.8  | 584.6     | 77,112.3  | 77,112.3  | 61,973.2  | 15,139.1  | 15,139.1  | 13,638.5  | 1,500.6  |
| Comp. Mass fraction             |          |           |           |           |           |           |           |           |           |           |           |           |           |          |
| Water                           | 0.0000   | 1.0000    | 0.0000    | 0.9843    | 0.9843    | 0.9843    | 0.6876    | 0.9866    | 0.9866    | 0.9982    | 0.9387    | 0.9387    | 0.9975    | 0.4043   |
| Glycerol                        | 1.0000   | 0.0000    | 0.0000    | 0.0134    | 0.0134    | 0.0000    | 0.0000    | 0.0000    | 0.0000    | 0.0000    | 0.0000    | 0.0000    | 0.0000    | 0.0000   |
| <i>E. coli</i>                  | 0.0000   | 0.0000    | 1.0000    | 0.0023    | 0.0023    | 0.0023    | 0.3030    | 0.0000    | 0.0000    | 0.0000    | 0.0000    | 0.0000    | 0.0000    | 0.0000   |
| Succinic acid                   | 0.0000   | 0.0000    | 0.0000    | 0.0000    | 0.0000    | 0.0003    | 0.0002    | 0.0003    | 0.0003    | 0.0004    | 0.0000    | 0.0000    | 0.0000    | 0.0000   |
| Lactic acid                     | 0.0000   | 0.0000    | 0.0000    | 0.0000    | 0.0000    | 0.0003    | 0.0002    | 0.0003    | 0.0003    | 0.0004    | 0.0000    | 0.0000    | 0.0000    | 0.0000   |
| Acetic acid                     | 0.0000   | 0.0000    | 0.0000    | 0.0000    | 0.0000    | 0.0003    | 0.0002    | 0.0003    | 0.0003    | 0.0004    | 0.0000    | 0.0000    | 0.0000    | 0.0000   |
| Butyric acid                    | 0.0000   | 0.0000    | 0.0000    | 0.0000    | 0.0000    | 0.0009    | 0.0006    | 0.0009    | 0.0009    | 0.0006    | 0.0023    | 0.0023    | 0.0023    | 0.0021   |
| Ethanol                         | 0.0000   | 0.0000    | 0.0000    | 0.0000    | 0.0000    | 0.0009    | 0.0006    | 0.0009    | 0.0009    | 0.0000    | 0.0045    | 0.0045    | 0.0001    | 0.0448   |
| Butanol                         | 0.0000   | 0.0000    | 0.0000    | 0.0000    | 0.0000    | 0.0107    | 0.0075    | 0.0107    | 0.0107    | 0.0000    | 0.0545    | 0.0545    | 0.0001    | 0.5488   |

**Table S.3.** Process streams for butanol production (continuation).

| <b>Stream</b>                   | <b>15</b> | <b>16</b> | <b>17</b> | <b>18</b> | <b>19</b> | <b>20</b> |
|---------------------------------|-----------|-----------|-----------|-----------|-----------|-----------|
| Temperature (°C)                | 112.2     | 112.2     | 112.2     | 78.5      | 115.6     | 35.1      |
| Pressure (atm)                  | 1.3       | 1.3       | 1.3       | 1.0       | 1.0       | 1.0       |
| Vapor mass fraction             | 1.0000    | 1.0000    | 0.0000    | 0.0000    | 0.0000    | 0.0000    |
| Liquid mass fraction            | 0.0000    | 0.0000    | 1.0000    | 1.0000    | 1.0000    | 1.0000    |
| Solid mass fraction             | 0.0000    | 0.0000    | 0.0000    | 0.0000    | 0.0000    | 0.0000    |
| Mass enthalpy (kJ/kg)           | -7,556.0  | -12,018.5 | -4,396.5  | -7,009.2  | -4,185.8  | -4,440.3  |
| Molar flow (kmol/h)             | 46.3      | 34.5      | 11.8      | 1.6       | 10.2      | 10.2      |
| Volume flow (m <sup>3</sup> /h) | 1,084.2   | 810.8     | 1.1       | 0.1       | 1.1       | 0.9       |
| Mass flow (kg/h)                | 1,500.6   | 688.0     | 812.6     | 60.6      | 752.1     | 752.1     |
| Comp. Mass fraction             |           |           |           |           |           |           |
| Water                           | 0.4043    | 0.8701    | 0.0100    | 0.1177    | 0.0013    | 0.0013    |
| Glycerol                        | 0.0000    | 0.0000    | 0.0000    | 0.0000    | 0.0000    | 0.0000    |
| <i>E. coli</i>                  | 0.0000    | 0.0000    | 0.0000    | 0.0000    | 0.0000    | 0.0000    |
| Succinic acid                   | 0.0000    | 0.0000    | 0.0000    | 0.0000    | 0.0000    | 0.0000    |
| Lactic acid                     | 0.0000    | 0.0000    | 0.0000    | 0.0000    | 0.0000    | 0.0000    |
| Acetic acid                     | 0.0000    | 0.0000    | 0.0000    | 0.0000    | 0.0000    | 0.0000    |
| Butyric acid                    | 0.0021    | 0.0005    | 0.0034    | 0.0000    | 0.0037    | 0.0037    |
| Ethanol                         | 0.0448    | 0.0098    | 0.0745    | 0.8758    | 0.0100    | 0.0100    |
| Butanol                         | 0.5488    | 0.1197    | 0.9121    | 0.0065    | 0.9850    | 0.9850    |

**Table S.4.** Equipment details for ethanol production.

| <b>Heat Exchangers</b>                                     |                 |                                                            |            |
|------------------------------------------------------------|-----------------|------------------------------------------------------------|------------|
| <b>HE-1</b>                                                |                 | <b>HE-2</b>                                                |            |
| Duty (GJ.h <sup>-1</sup> )                                 | 5.16            | Duty (GJ.h <sup>-1</sup> )                                 | 0.47       |
| Area (m <sup>2</sup> )                                     | 6.75            | Area (m <sup>2</sup> )                                     | 5.04       |
| U (kJ.°C <sup>-1</sup> .m <sup>-2</sup> .h <sup>-1</sup> ) | 8,183.01        | U (kJ.°C <sup>-1</sup> .m <sup>-2</sup> .h <sup>-1</sup> ) | 2,045.75   |
| Utility flowrate - LP Steam (kg.h <sup>-1</sup> )          | 2,353.21        | Utility flowrate - Cooling Water (kg.h <sup>-1</sup> )     | 22,441.70  |
| Cost (US\$)                                                | 8,037.09        | Cost (US\$)                                                | 3,835.58   |
| <b>Compressor</b>                                          |                 |                                                            |            |
| <b>CP-1</b>                                                |                 |                                                            |            |
| Volume flowrate (m <sup>3</sup> .h <sup>-1</sup> )         | 366.90          |                                                            |            |
| Pressure increase (kPa)                                    | 278.68          |                                                            |            |
| Power (kW)                                                 | 18.22           |                                                            |            |
| Cost (US\$)                                                | 99,709.03       |                                                            |            |
| <b>Adsorption Vessels</b>                                  |                 |                                                            |            |
| <b>PSA-1</b>                                               |                 |                                                            |            |
| Number of Vessels                                          | 4               |                                                            |            |
| Height / diameter (m)                                      | 0.9 / 0.3       |                                                            |            |
| Cycle time (min)                                           | 11.50           |                                                            |            |
| Total Cost (US\$)                                          | 53,145.63       |                                                            |            |
| <b>Reactors</b>                                            |                 |                                                            |            |
| <b>R-1</b>                                                 |                 |                                                            |            |
| Number of Vessels                                          | 10              |                                                            |            |
| Height / diameter (m)                                      | 13.84 / 6.92    |                                                            |            |
| Cycle time (min)                                           | 70.00           |                                                            |            |
| Total Cost (US\$)                                          | 6,358,772.64    |                                                            |            |
| <b>Distillation Column</b>                                 |                 |                                                            |            |
| <b>C-1</b>                                                 |                 | <b>Condenser (Partial)</b>                                 |            |
| Temperature - top / bottom (°C)                            | 78.16 / 99.99   | Duty (GJ.h <sup>-1</sup> )                                 | 2.55       |
| Pressure - top / bottom (kPa)                              | 101.33 / 101.33 | Area (m <sup>2</sup> )                                     | 17.18      |
| Height / diameter (m)                                      | 21.93 / 1.03    | U (kJ.°C <sup>-1</sup> .m <sup>-2</sup> .h <sup>-1</sup> ) | 2,045.75   |
| Number of stages                                           | 62              | Utility flowrate – Cooling Water (kg.h <sup>-1</sup> )     | 122,055.00 |
| Reflux ratio (molar)                                       | 5               | Cost (US\$)                                                | 4,666.79   |
| Cost (US\$)                                                | 238,934.56      |                                                            |            |
| <b>Reboiler</b>                                            |                 |                                                            |            |
| Duty (GJ.h <sup>-1</sup> )                                 | 30.91           |                                                            |            |
| Area (m <sup>2</sup> )                                     | 81.51           |                                                            |            |
| U (kJ.°C <sup>-1</sup> .m <sup>-2</sup> .h <sup>-1</sup> ) | 8,183.01        |                                                            |            |
| Utility flowrate - LP Steam (kg.h <sup>-1</sup> )          | 14,101.30       |                                                            |            |
| Cost (US\$)                                                | 50,467.03       |                                                            |            |
| <b>Other</b>                                               |                 |                                                            |            |
| <b>CFG-1</b>                                               |                 |                                                            |            |
| Solid mass flowrate (ton.h <sup>-1</sup> )                 | 0.04            |                                                            |            |
| Cost (US\$)                                                | 92,232.66       |                                                            |            |

**Table S.5.** Equipment details for propanol production.

| <b>Heat Exchangers</b>                                     |                 |                                                            |           |
|------------------------------------------------------------|-----------------|------------------------------------------------------------|-----------|
| <b>HE-1</b>                                                |                 | <b>HE-2</b>                                                |           |
| Duty (GJ.h <sup>-1</sup> )                                 | 0.67            | Duty (GJ.h <sup>-1</sup> )                                 | 0.60      |
| Area (m <sup>2</sup> )                                     | 0.85            | Area (m <sup>2</sup> )                                     | 8.70      |
| U (kJ.°C <sup>-1</sup> .m <sup>-2</sup> .h <sup>-1</sup> ) | 8,183.01        | U (kJ.°C <sup>-1</sup> .m <sup>-2</sup> .h <sup>-1</sup> ) | 2,045.75  |
| Utility flowrate - LP Steam (kg.h <sup>-1</sup> )          | 4,129.02        | Utility flowrate - Cooling Water (kg.h <sup>-1</sup> )     | 28,972.90 |
| Cost (US\$)                                                | 5,768.13        | Cost (US\$)                                                | 4,185.59  |
| <b>Compressor</b>                                          |                 |                                                            |           |
| <b>CP-1</b>                                                |                 |                                                            |           |
| Volume flowrate (m <sup>3</sup> .h <sup>-1</sup> )         | 1,087.53        |                                                            |           |
| Pressure increase (kPa)                                    | 33.57           |                                                            |           |
| Power (kW)                                                 | 11.95           |                                                            |           |
| Cost (US\$)                                                | 76,449.58       |                                                            |           |
| <b>Adsorption Vessels</b>                                  |                 |                                                            |           |
| <b>PSA-1</b>                                               |                 |                                                            |           |
| Number of Vessels                                          | 4               |                                                            |           |
| Height / diameter (m)                                      | 6.92 / 2.31     |                                                            |           |
| Cycle time (min)                                           | 480             |                                                            |           |
| Total Cost (US\$)                                          | 434,943.00      |                                                            |           |
| <b>Reactors</b>                                            |                 |                                                            |           |
| <b>R-1</b>                                                 |                 |                                                            |           |
| Number of Vessels                                          | 10              |                                                            |           |
| Height / diameter (m)                                      | 11.7 / 5.85     |                                                            |           |
| Cycle time (min)                                           | 140             |                                                            |           |
| Total Cost (US\$)                                          | 5,038,920.35    |                                                            |           |
| <b>Distillation Column</b>                                 |                 |                                                            |           |
| <b>C-1</b>                                                 |                 | <b>Condenser (Partial)</b>                                 |           |
| Temperature - top / bottom (°C)                            | 89.85 / 100.08  | Duty (GJ.h <sup>-1</sup> )                                 | 0.06      |
| Pressure - top / bottom (kPa)                              | 101.33 / 101.33 | Area (m <sup>2</sup> )                                     | 0.48      |
| Height / diameter (m)                                      | 19.72 / 0.91    | U (kJ.°C <sup>-1</sup> .m <sup>-2</sup> .h <sup>-1</sup> ) | 2,045.75  |
| Number of stages                                           | 56              | Utility flowrate – Cooling Water (kg.h <sup>-1</sup> )     | 2,957.36  |
| Reflux ratio (molar)                                       | 0.04            | Cost (US\$)                                                | 2,636.36  |
| Cost (US\$)                                                | 201,330.25      |                                                            |           |
| <b>Reboiler</b>                                            |                 |                                                            |           |
| Duty (GJ.h <sup>-1</sup> )                                 | 9.05            |                                                            |           |
| Area (m <sup>2</sup> )                                     | 45.30           |                                                            |           |
| U (kJ.°C <sup>-1</sup> .m <sup>-2</sup> .h <sup>-1</sup> ) | 8,183.01        |                                                            |           |
| Utility flowrate - LP Steam (kg.h <sup>-1</sup> )          | 4,129.02        |                                                            |           |
| Cost (US\$)                                                | 42,393.12       |                                                            |           |
| <b>Other</b>                                               |                 |                                                            |           |
| <b>CFG-1</b>                                               |                 |                                                            |           |
| Solid mass flowrate (ton.h <sup>-1</sup> )                 | 0.19            |                                                            |           |
| Cost (US\$)                                                | 145,276.72      |                                                            |           |

**Table S.6.** Equipment details for butanol production.

| <b>Heat Exchangers</b>                                     |                 |                                                            |                 |
|------------------------------------------------------------|-----------------|------------------------------------------------------------|-----------------|
| <b>HE-1</b>                                                |                 | <b>HE-2</b>                                                |                 |
| Duty (GJ.h <sup>-1</sup> )                                 | 3.86            | Duty (GJ.h <sup>-1</sup> )                                 | 195.08          |
| Area (m <sup>2</sup> )                                     | 5.04            | Area (m <sup>2</sup> )                                     | 612.41          |
| U (kJ.°C <sup>-1</sup> .m <sup>-2</sup> .h <sup>-1</sup> ) | 8,183.01        | U (kJ.°C <sup>-1</sup> .m <sup>-2</sup> .h <sup>-1</sup> ) | 8,183.01        |
| Utility flowrate - LP Steam (kg.h <sup>-1</sup> )          | 1,759.55        | Utility flowrate - Cooling Water (kg.h <sup>-1</sup> )     | 89,001.50       |
| Cost (US\$)                                                | 7,671.61        | Cost (US\$)                                                | 147,322.19      |
| <b>HE-3</b>                                                |                 | <b>HE-4</b>                                                |                 |
| Duty (GJ.h <sup>-1</sup> )                                 | 22.78           | Duty (GJ.h <sup>-1</sup> )                                 | 0.19            |
| Area (m <sup>2</sup> )                                     | 100.73          | Area (m <sup>2</sup> )                                     | 2.65            |
| U (kJ.°C <sup>-1</sup> .m <sup>-2</sup> .h <sup>-1</sup> ) | 8,183.01        | U (kJ.°C <sup>-1</sup> .m <sup>-2</sup> .h <sup>-1</sup> ) | 2,045.75        |
| Utility flowrate - LP Steam (kg.h <sup>-1</sup> )          | 10,394.20       | Utility flowrate - Cooling Water (kg.h <sup>-1</sup> )     | 9,173.47        |
| Cost (US\$)                                                | 54,564.43       | Cost (US\$)                                                | 3,460.05        |
| <b>Compressor</b>                                          |                 |                                                            |                 |
| <b>CP-1</b>                                                |                 |                                                            |                 |
| Volume flowrate (m <sup>3</sup> .h <sup>-1</sup> )         | 1,371.12        |                                                            |                 |
| Pressure increase (kPa)                                    | 33.57           |                                                            |                 |
| Power (kW)                                                 | 15.06           |                                                            |                 |
| Cost (US\$)                                                | 88,423.42       |                                                            |                 |
| <b>Adsorption Vessels</b>                                  |                 |                                                            |                 |
| <b>PSA-1</b>                                               |                 |                                                            |                 |
| Number of Vessels                                          | 4               |                                                            |                 |
| Height / diameter (m)                                      | 7.70 / 2.57     |                                                            |                 |
| Cycle time (min)                                           | 480             |                                                            |                 |
| Total Cost (US\$)                                          | 530,690.07      |                                                            |                 |
| <b>Reactors</b>                                            |                 |                                                            |                 |
| <b>R-1</b>                                                 |                 |                                                            |                 |
| Number of Vessels                                          | 10              |                                                            |                 |
| Height / diameter (m)                                      | 11.14 / 5.57    |                                                            |                 |
| Cycle time (min)                                           | 47              |                                                            |                 |
| Total Cost (US\$)                                          | 4,714,986.88    |                                                            |                 |
| <b>Distillation Columns</b>                                |                 |                                                            |                 |
| <b>C-1</b>                                                 |                 | <b>C-1 Condenser (Total)</b>                               |                 |
| Temperature - top / bottom (°C)                            | 89.85 / 100.08  | Duty (GJ.h <sup>-1</sup> )                                 | 0.06            |
| Pressure - top / bottom (kPa)                              | 101.33 / 101.33 | Area (m <sup>2</sup> )                                     | 0.48            |
| Height / diameter (m)                                      | 19.72 / 0.91    | U (kJ.°C <sup>-1</sup> .m <sup>-2</sup> .h <sup>-1</sup> ) | 2,045.75        |
| Number of stages                                           | 56              | Utility flowrate – Cooling Water (kg.h <sup>-1</sup> )     | 2,957.36        |
| Reflux ratio (molar)                                       | 0.04            | Cost (US\$)                                                | 2,636.36        |
| Cost (US\$)                                                | 201,330.25      |                                                            |                 |
| <b>C-1 Reboiler</b>                                        |                 | <b>C-2</b>                                                 |                 |
| Duty (GJ.h <sup>-1</sup> )                                 | 9.05            | Temperature - top / bottom (°C)                            | 91.94 / 99.99   |
| Area (m <sup>2</sup> )                                     | 45.30           | Pressure - top / bottom (kPa)                              | 101.33 / 101.33 |
| U (kJ.°C <sup>-1</sup> .m <sup>-2</sup> .h <sup>-1</sup> ) | 8,183.01        | Height / diameter (m)                                      | 5.29 / 1.16     |
| Utility flowrate - LP Steam (kg.h <sup>-1</sup> )          | 4,129.02        | Number of stages                                           | 6.0             |
| Cost (US\$)                                                | 42,393.12       | Reflux ratio (molar)                                       | 12.00           |
|                                                            |                 | Cost (US\$)                                                | 134,799.47      |
| <b>C-2 Reboiler</b>                                        |                 | <b>C-2 Condenser (Partial)</b>                             |                 |
| Duty (GJ.h <sup>-1</sup> )                                 | 2.70            | Duty (GJ.h <sup>-1</sup> )                                 | 23.12           |
| Area (m <sup>2</sup> )                                     | 13.46           | Area (m <sup>2</sup> )                                     | 175.44          |
| U (kJ.°C <sup>-1</sup> .m <sup>-2</sup> .h <sup>-1</sup> ) | 8,183.01        | U (kJ.°C <sup>-1</sup> .m <sup>-2</sup> .h <sup>-1</sup> ) | 2,045.75        |
| Utility flowrate - LP Steam (kg.h <sup>-1</sup> )          | 1,231.82        | Utility flowrate – Cooling Water (kg.h <sup>-1</sup> )     | 1,107,790.00    |
| Cost (US\$)                                                | 8,976.44        | Cost (US\$)                                                | 55,650.30       |



**Table S.6.** Equipment details for butanol production (continuation).

| <b>Distillation Columns</b>                                |                 |                                                            |           |
|------------------------------------------------------------|-----------------|------------------------------------------------------------|-----------|
| <b>C-3</b>                                                 |                 | <b>C-3 Condenser (Total)</b>                               |           |
| Temperature - top / bottom (°C)                            | 78.5 / 115.63   | Duty (GJ.h <sup>-1</sup> )                                 | 0.76      |
| Pressure - top / bottom (kPa)                              | 101.33 / 101.33 | Area (m <sup>2</sup> )                                     | 7.28      |
| Height / diameter (m)                                      | 3.95 / 0.56     | U (kJ.°C <sup>-1</sup> .m <sup>-2</sup> .h <sup>-1</sup> ) | 2,045.75  |
| Number of stages                                           | 8.0             | Utility flowrate – Cooling Water (kg.h <sup>-1</sup> )     | 36,390.60 |
| Reflux ratio (molar)                                       | 11.30           | Cost (US\$)                                                | 4,068.10  |
| Cost (US\$)                                                | 56,525.45       |                                                            |           |
| <b>C-3 Reboiler</b>                                        |                 |                                                            |           |
| Duty (GJ.h <sup>-1</sup> )                                 | 0.76            |                                                            |           |
| Area (m <sup>2</sup> )                                     | 10.48           |                                                            |           |
| U (kJ.°C <sup>-1</sup> .m <sup>-2</sup> .h <sup>-1</sup> ) | 8,183.01        |                                                            |           |
| Utility flowrate - LP Steam (kg.h <sup>-1</sup> )          | 346.53          |                                                            |           |
| Cost (US\$)                                                | 4,312.02        |                                                            |           |
| <b>Other</b>                                               |                 |                                                            |           |
| <b>CFG-1</b>                                               |                 |                                                            |           |
| Solid mass flowrate (ton.h <sup>-1</sup> )                 | 0.18            |                                                            |           |
| Cost (US\$)                                                | 142,364.40      |                                                            |           |
